# Supplementary material for: Antitumor properties of Coenzyme Q0 against human ovarian carcinoma cells via induction of ROS-mediated apoptosis and cytoprotective autophagy
Source: PubMed Central journal article supplement (PMC5556069; doi:10.1038/s41598-017-08659-7), 2017-08-14
Supplement: 41598_2017_8659_MOESM1_ESM.pdf [file 41598_2017_8659_MOESM1_ESM.pdf]

## SREP-17-17838A\_Supplementary Information

### **Antitumor properties of Coenzyme Q<sub>0</sub> against human ovarian carcinoma cells *via* induction of ROS-mediated apoptosis and cytoprotective autophagy**

You-Cheng Hseu<sup>a,b</sup>, Tai-Jung Tsai<sup>c</sup>, Mallikarjuna Korivi<sup>c</sup>, Jer-Yuh Liu<sup>d</sup>, Hui-Jye Chen<sup>e</sup>,  
Chung-Ming Lin<sup>f</sup>, Yi-Chun Shen<sup>c</sup>, Hsin-Ling Yang<sup>c,\*</sup>

<sup>a</sup>Department of Cosmeceutics, College of Biopharmaceutical and Food Sciences, China Medical University, Taichung 40402, Taiwan

<sup>b</sup>Department of Health and Nutrition Biotechnology, Asia University, Taichung 41354, Taiwan

<sup>c</sup>Institute of Nutrition, College of Biopharmaceutical and Food Sciences, China Medical University, Taichung 40402, Taiwan

<sup>d</sup>Graduate Institute of Cancer Biology, China Medical University, Taichung 40402, Taiwan

<sup>e</sup>Graduate Institute of Basic Medical Science, China Medical University, Taichung 402, Taiwan

<sup>f</sup>Department of Biotechnology, Ming Chuan University, Taoyuan 333, Taiwan

**H**

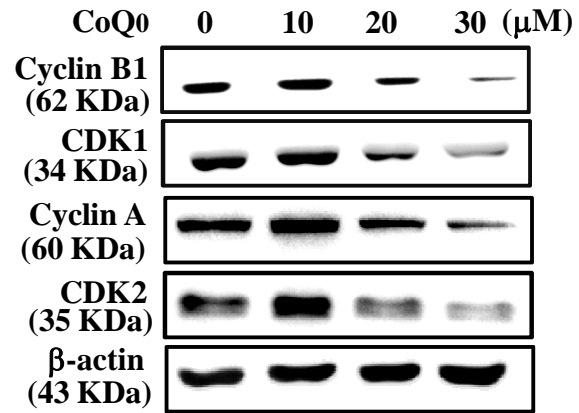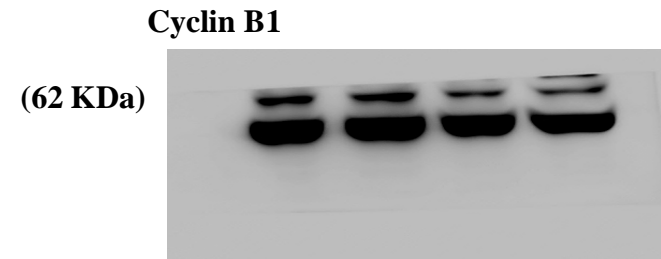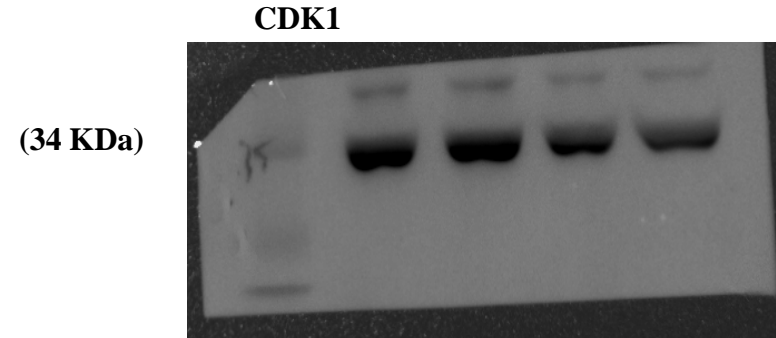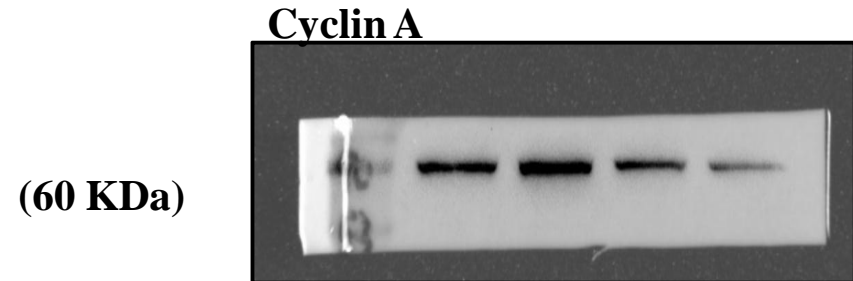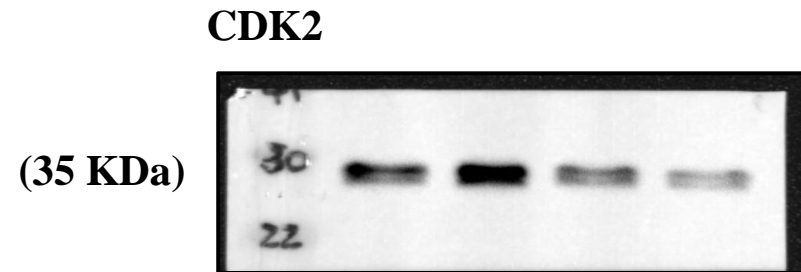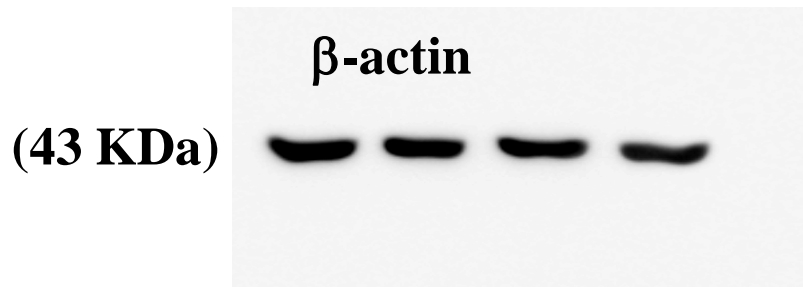

**Fig 1**

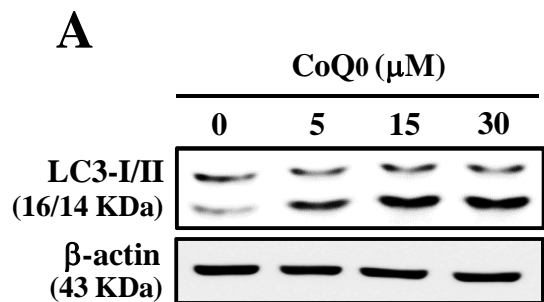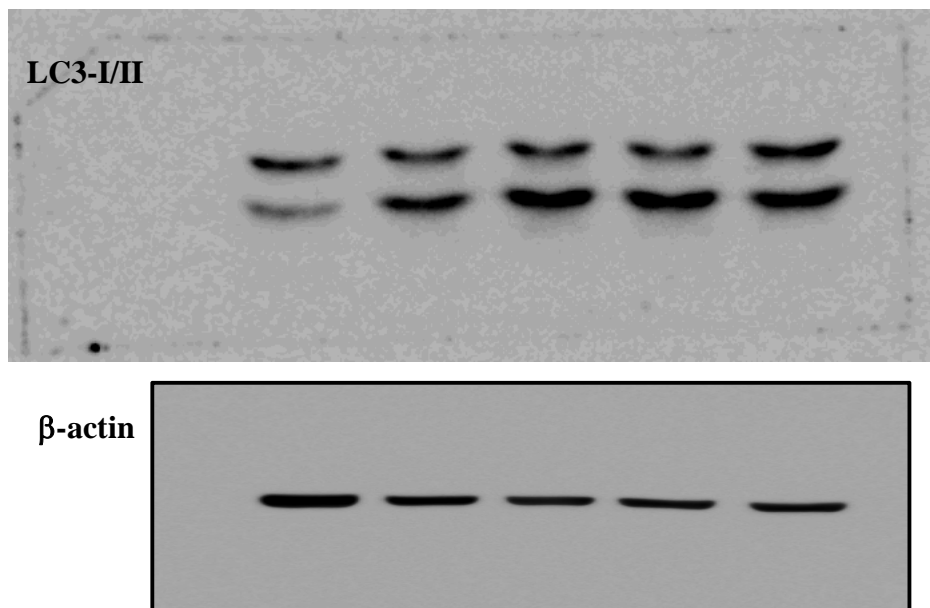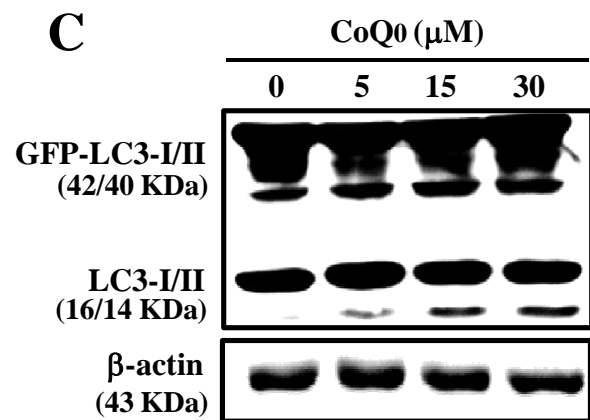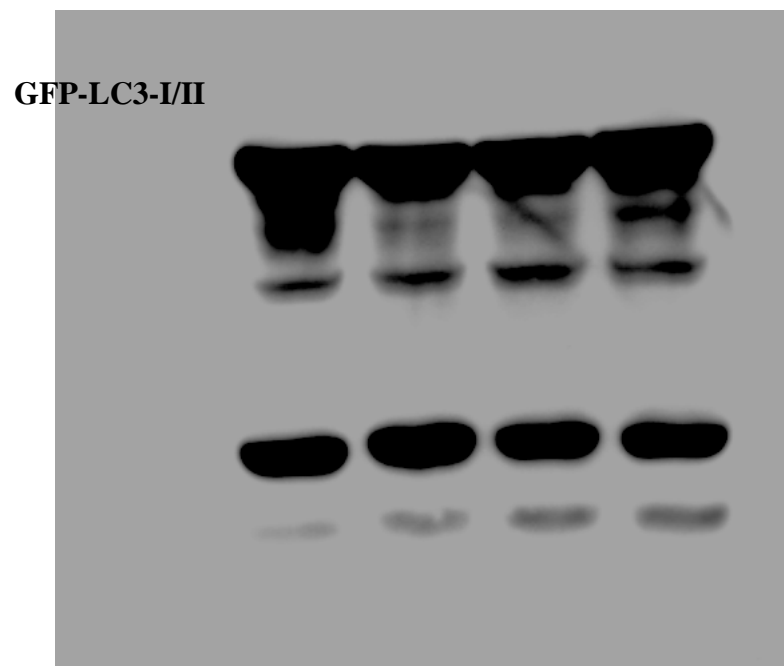

**Fig 3**

**A**

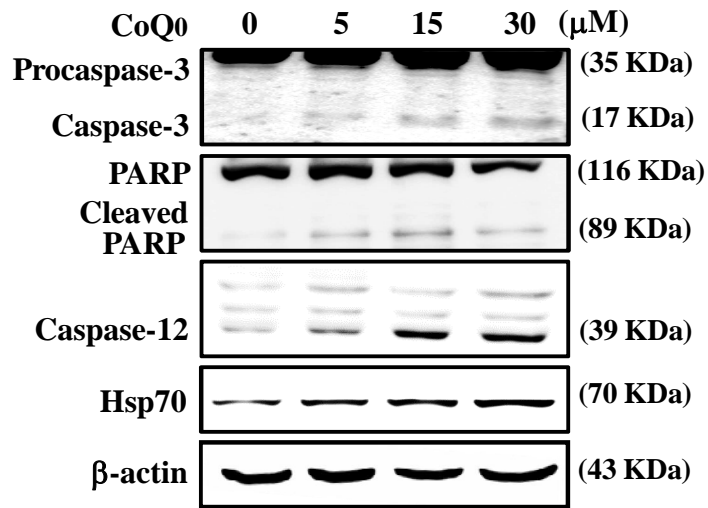

Procaspase-3

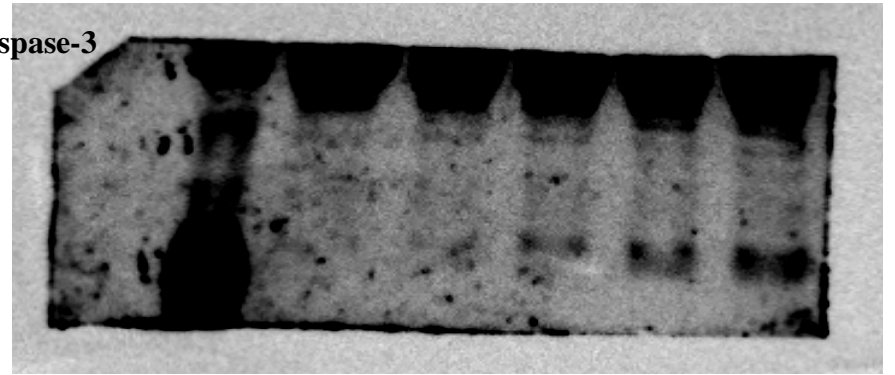

PARP

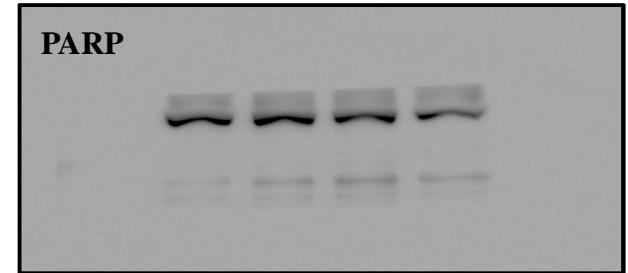

Caspase-12

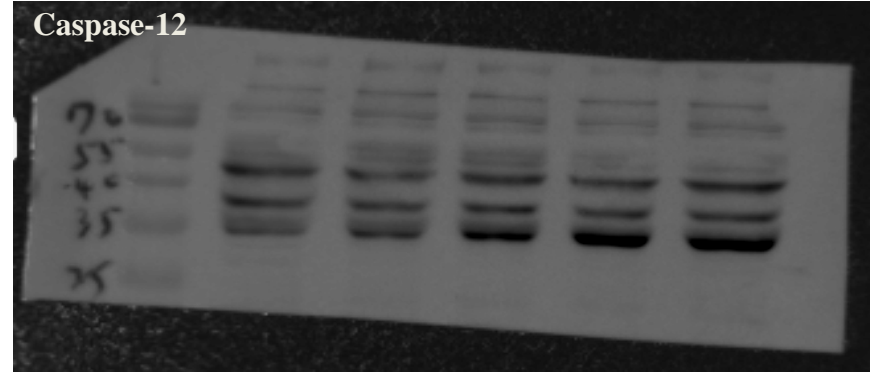

Hsp70

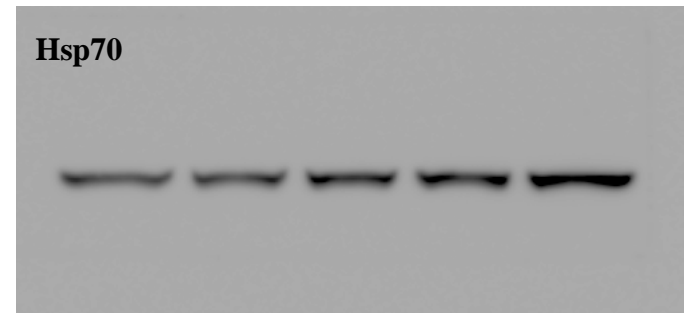

**Fig 4**

C

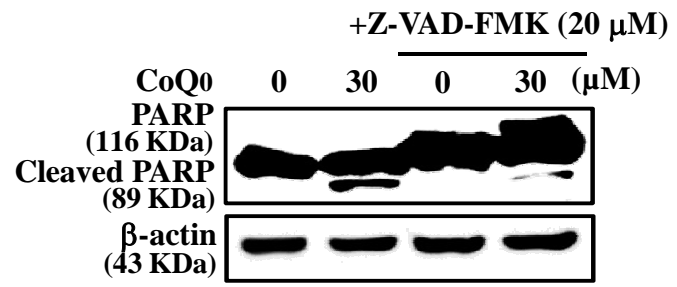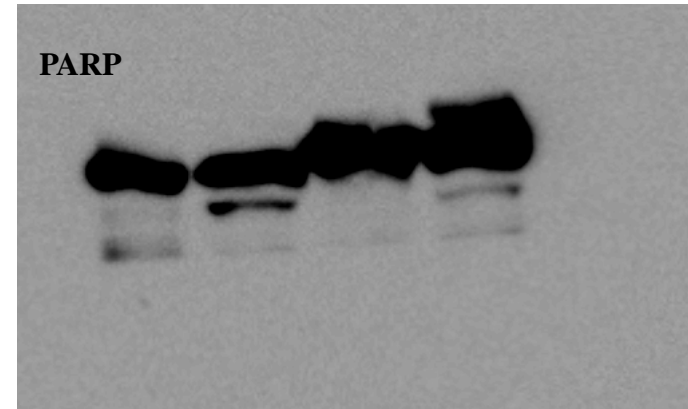

Fig 5

**A**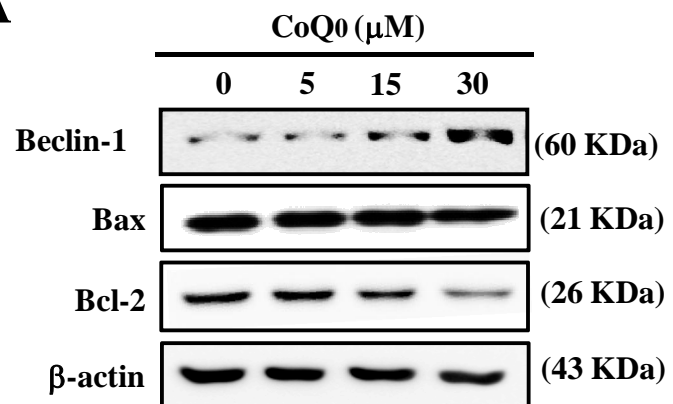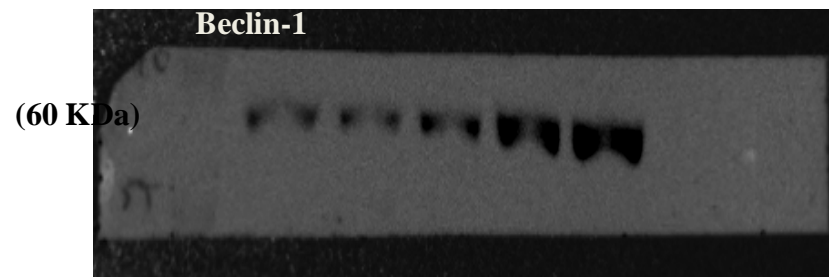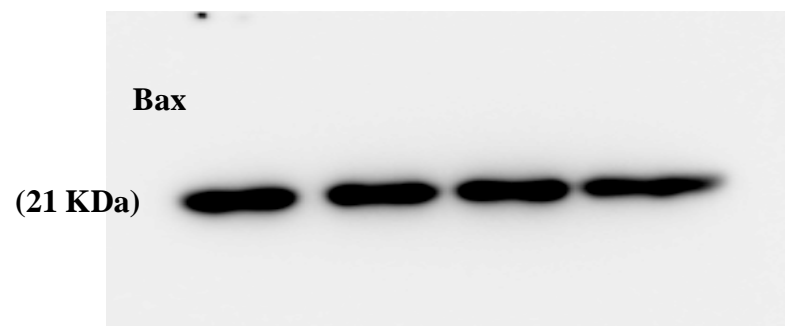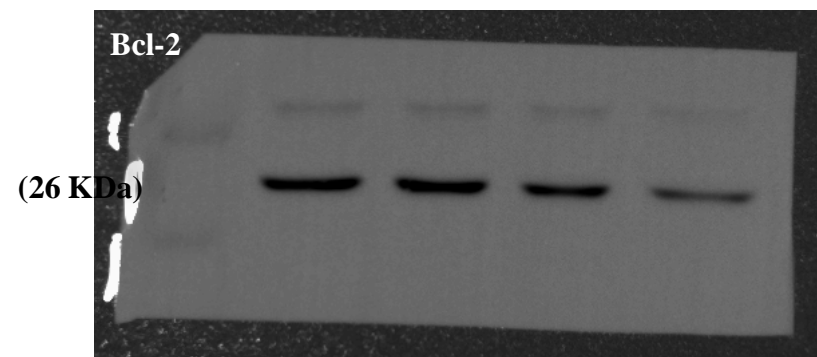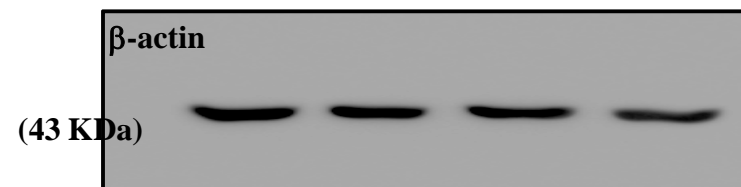**Fig 6**

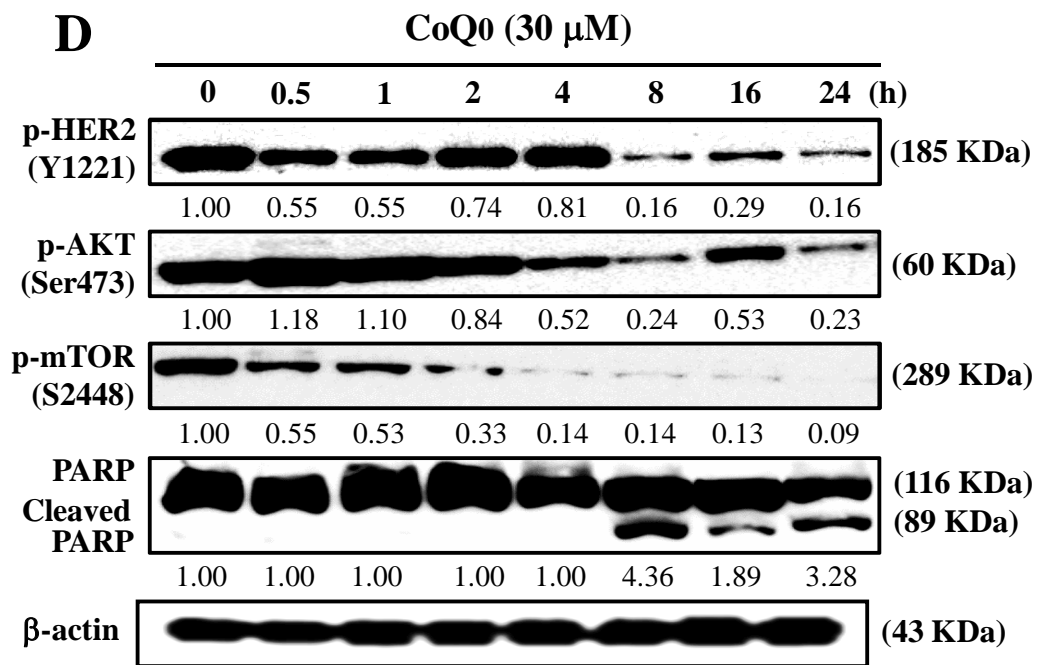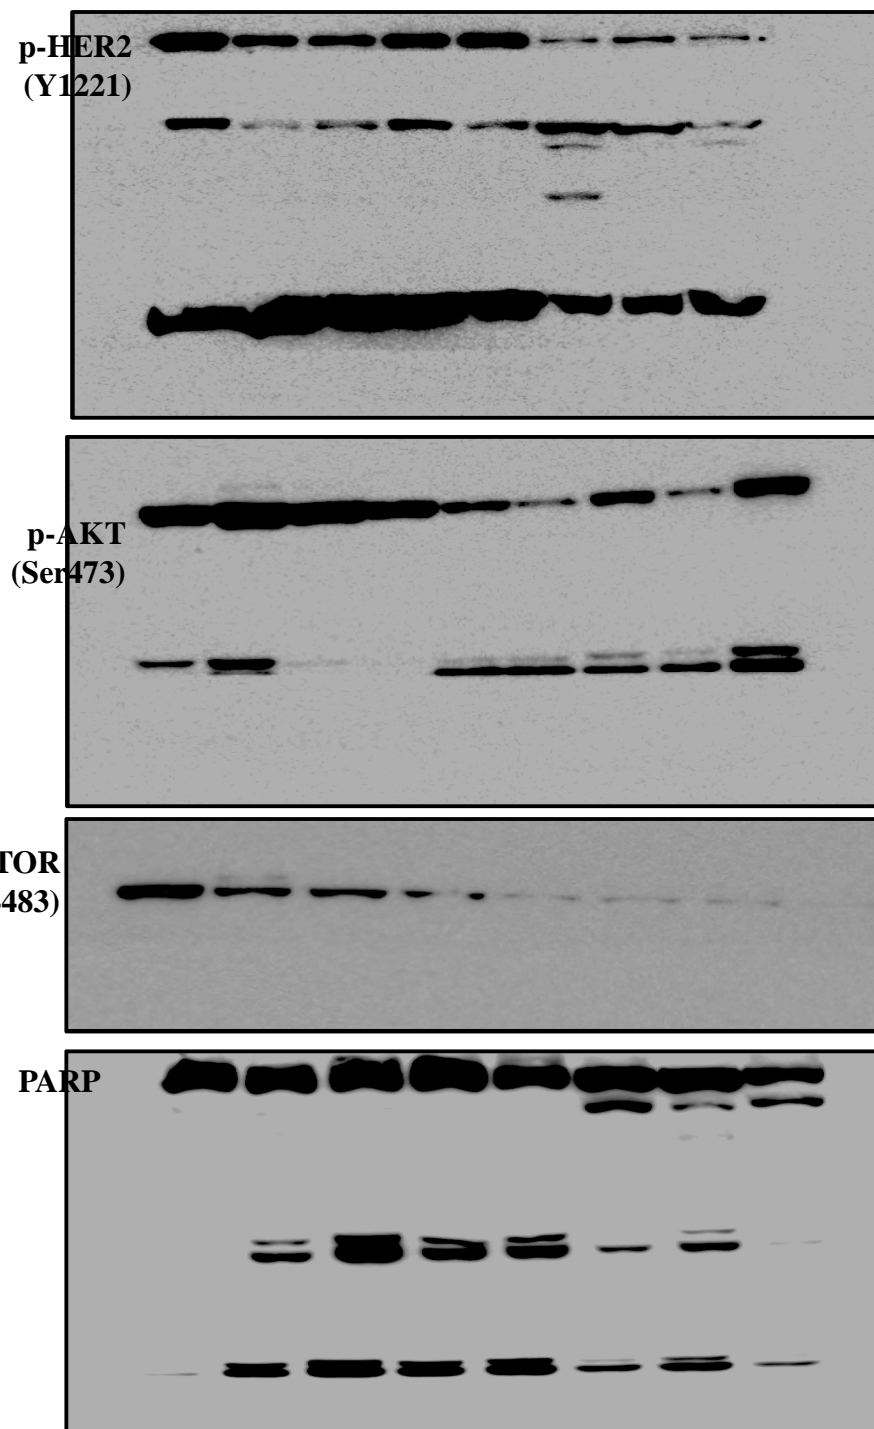

**Fig 6**

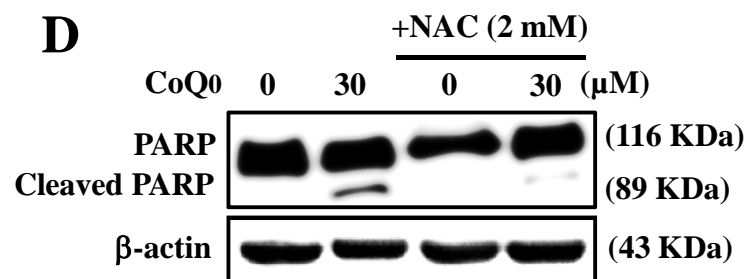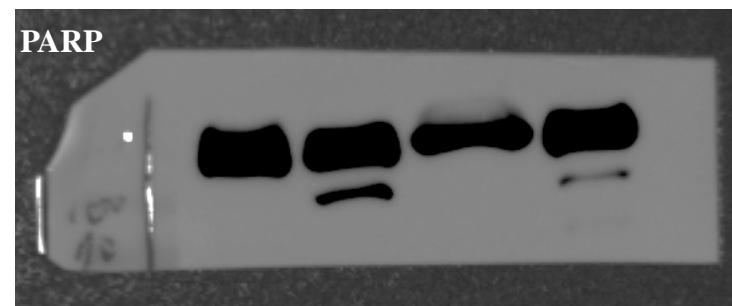

**Fig 7**



**A**

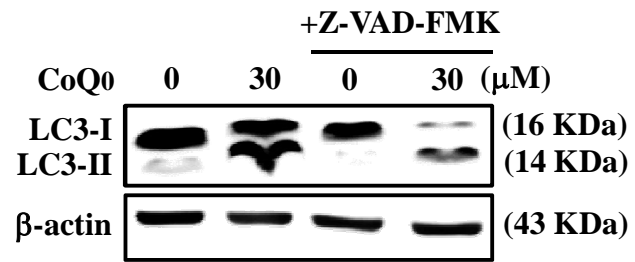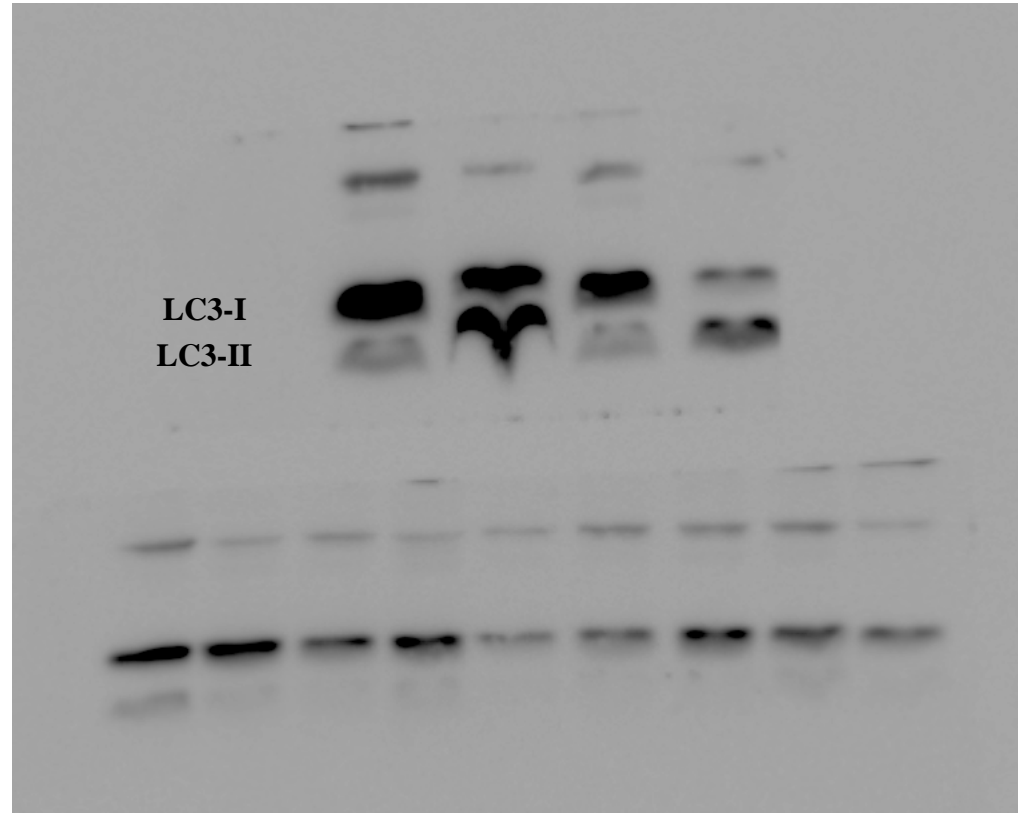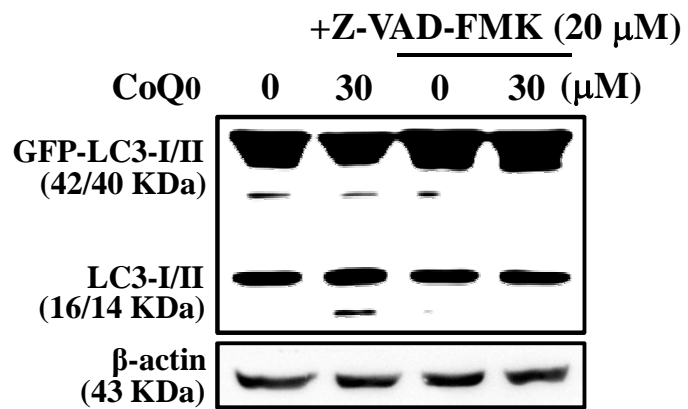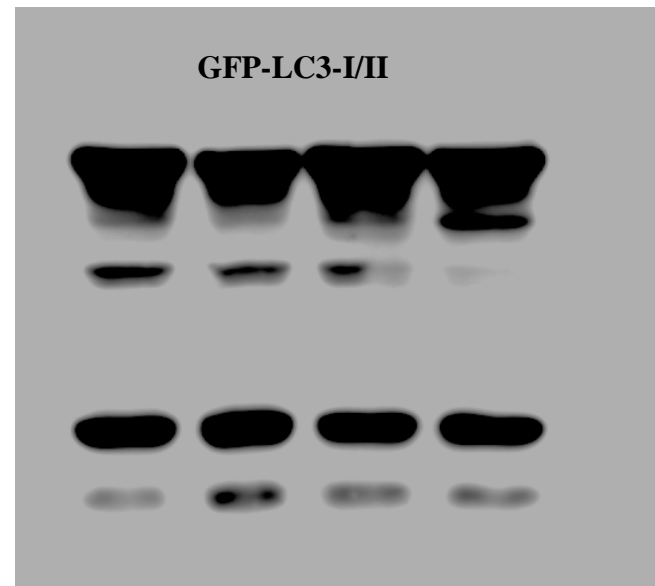

**Fig 8**

**C**

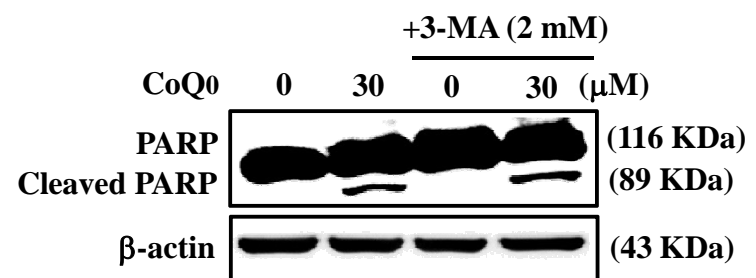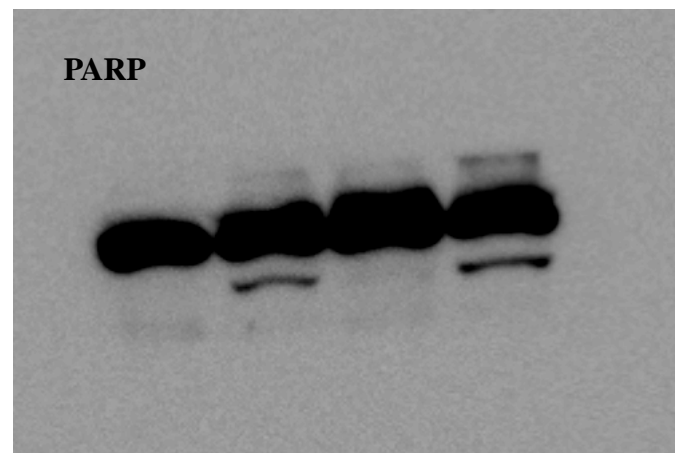

**Fig 9**
